# Supplementary material for: Identification and Characterization of Circular Intronic RNAs Derived from Insulin Gene
Source: MDPI journal article supplement (doi:10.3390/ijms21124302), 2020-06-17
Supplement: s1 [file s1]

# Identification and characterization of circular intronic RNAs derived from insulin gene

**Debojyoti Das<sup>1,2,#</sup>, Aniruddha Das<sup>1,2,#</sup>, Mousumi Sahu<sup>1</sup>, Smruti Sambhav Mishra<sup>1</sup>, Shaheerah Khan<sup>1</sup>, Pruthvi R. Bejugam<sup>1</sup>, Pranita K. Rout<sup>1</sup>, Arundhati Das<sup>1,2</sup>, Shehnaz Bano<sup>3</sup>, Gyan Prakash Mishra<sup>1</sup>, Sunil K. Raghav<sup>1</sup>, Anshuman Dixit<sup>1</sup>, and Amaresh C. Panda<sup>1,\*</sup>**

<sup>1</sup> Institute of Life Sciences (ILS), Nalco Square, Bhubaneswar, Odisha, India;

<sup>2</sup> School of Biotechnology, KIIT University, Bhubaneswar, Odisha, India

<sup>3</sup> National Center for Cell Sciences (NCCS), Pune, Maharashtra, India

# Contributed equally to this work

\* Correspondence: Amaresh C Panda, Email: [amaresh.panda@ils.res.in](mailto:amaresh.panda@ils.res.in), Tel: +91 674-2304314

**Figure S1**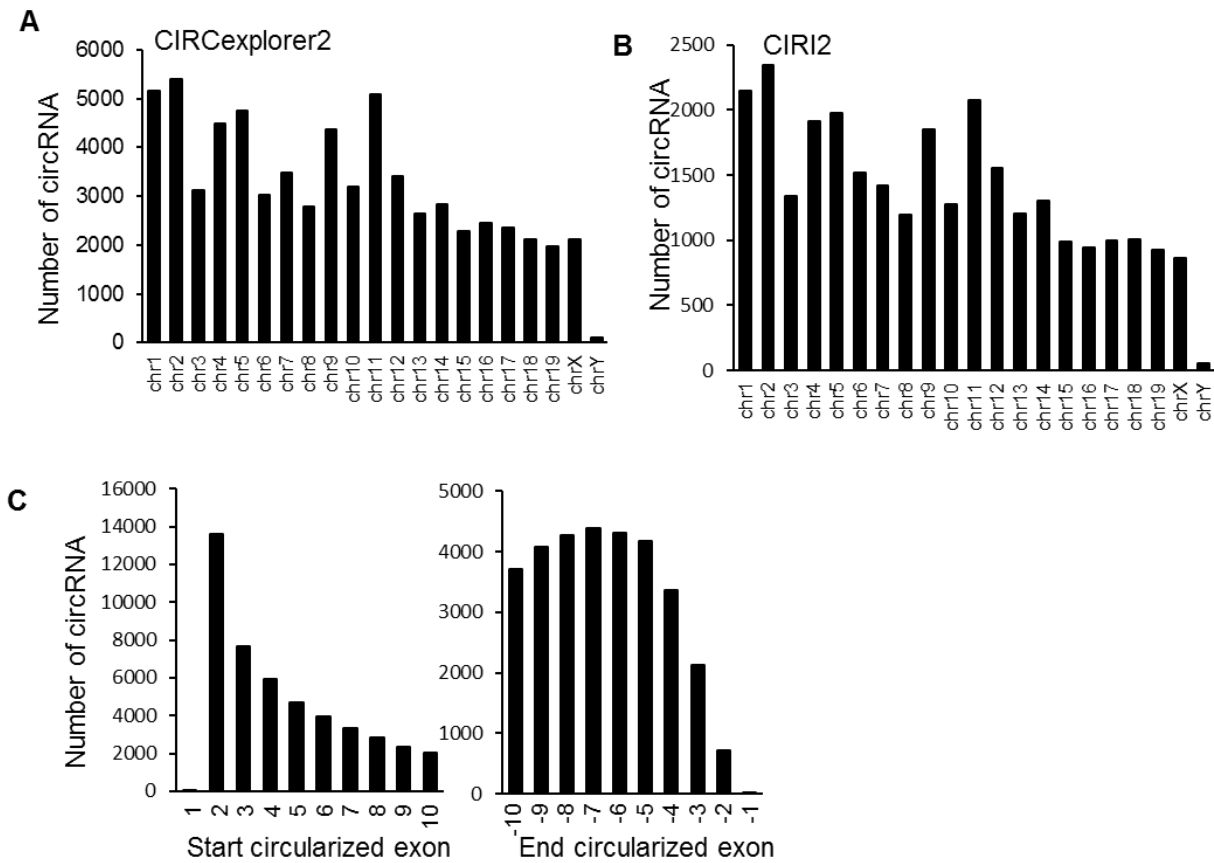

**Supplementary Figure S1: Characteristics of circRNAs in mouse pancreatic islets.** (A) Distribution of circRNAs per chromosome detected with CIRCexplorer2. (B) Distribution of circRNAs per chromosome detected with CIRI2. (C) Distribution of the start (*left*) and the end (*right*) 10 exons of linear RNAs used for the biogenesis of exonic circRNAs detected with CIRCexplorer2.

**Figure S2****A**

| circRNA Name | Parental gene | circRNA ID                 | Splice length | circRNA type | logFC (HFD/ND) | Pvalue   |
|--------------|---------------|----------------------------|---------------|--------------|----------------|----------|
| ci-Ins2-438  | Ins2          | chr7 142678908 142679346 R | 438           | ciRNA        | -2.655639      | 0.004973 |
| ci-Ins2-442  | Ins2          | chr7 142678904 142679346 R | 442           | ciRNA        | -3.389091      | 0.008988 |
| ci-Ins2-486  | Ins2          | chr7 142678860 142679346 R | 486           | ciRNA        | -3.380421      | 0.009369 |
| ci-Ins2-415  | Ins2          | chr7 142678931 142679346 R | 415           | ciRNA        | -2.5677        | 0.2984   |
| circBckdhb   | Bckdhb        | chr9 83988775 84012619 F   | 608           | circRNA      | 0.589953       | 0.0001   |
| circGlis3    | Glis3         | chr19 28530872 28531986 R  | 1114          | circRNA      | 0.032029       | 0.8302   |
| circCdk8     | Cdk8          | chr5 146259504 146271735 F | 328           | circRNA      | -0.42013       | 0.0256   |
| circAmbra1   | Ambra1        | chr2 91805023 91810209 F   | 267           | circRNA      | -1.039486      | 0.0072   |
| circAsph     | Asph          | chr4 9635900 9639347 R     | 219           | circRNA      | 0.351325       | 0.0087   |
| circNbas     | Nbas          | chr12 13482385 13484044 F  | 586           | circRNA      | 0.4631983      | 0.00542  |

**B**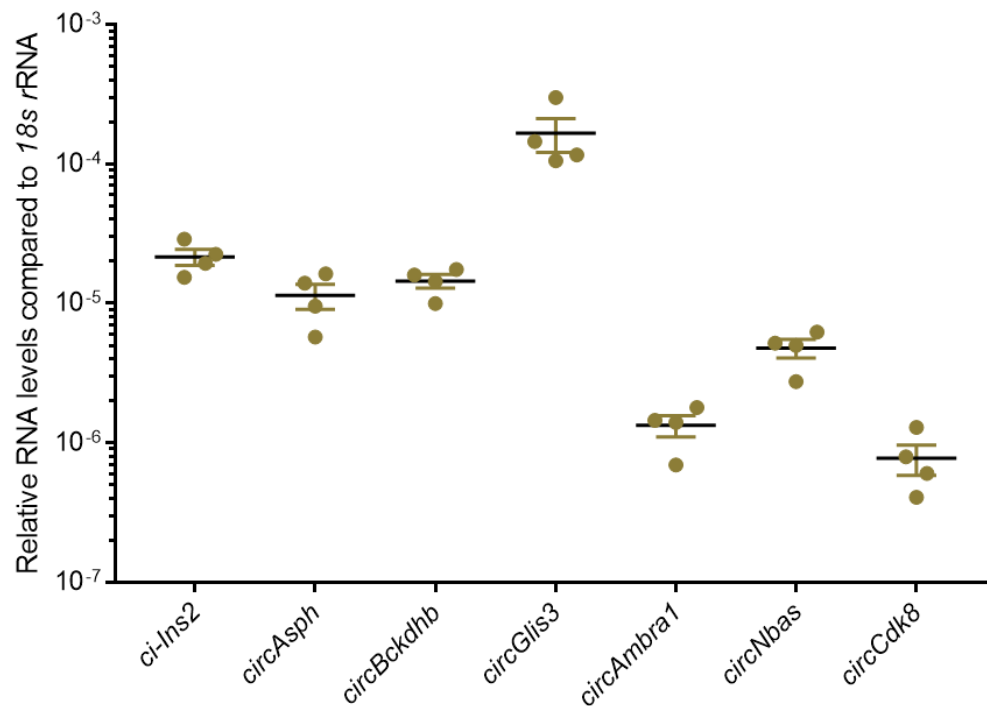

**Supplementary Figure S2: Selected list of circRNAs from RNA-seq data. (A)** A list of validated circRNAs detected using CIRCexplorer2. **(B)** Expression levels of selected circRNAs in  $\beta$ TC6 cells compared to 18s rRNA using RT-qPCR analysis.

**Figure S3**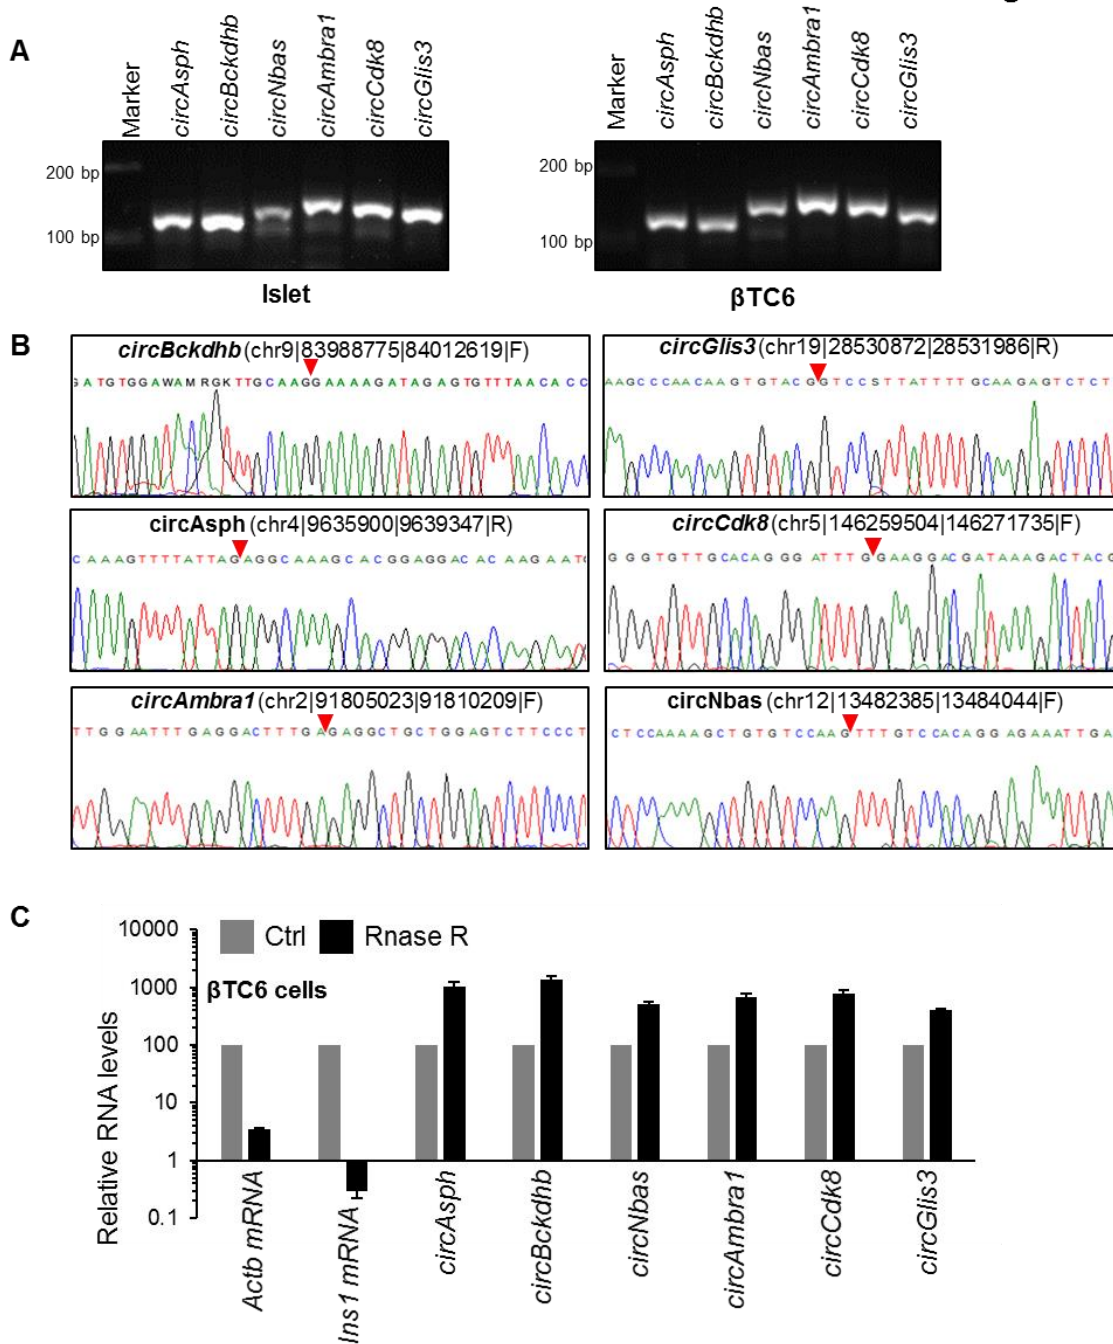

**Supplementary Figure S3: Validation of circRNAs in  $\beta$ TC6 cells.** (A) The RT-PCR results of selected circRNAs amplified from mice pancreatic islets (left) and  $\beta$ TC6 (right) with divergent primers and visualized in SYBR Gold stained 2.5 % agarose gel. (B) RT-PCR products were purified and sequenced to confirm the junction sequences of detected circRNAs from  $\beta$ TC6 cells. (C) RT-qPCR analysis showing the levels of mRNAs and circRNAs in  $\beta$ TC6 cells upon RNase R treatment. Data represents the means  $\pm$  S.E.M. from three independent experiments.

**Figure S4**

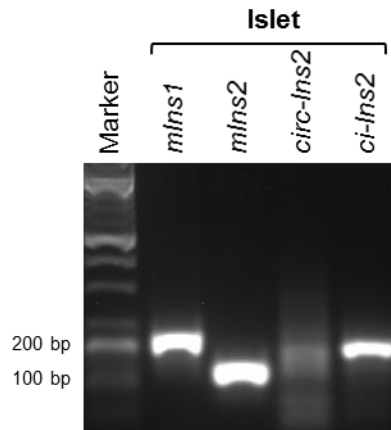

**Supplementary Figure S4: Validation of circular *Ins2* transcripts in islets.** The RT-PCR products of *Ins1*, *Ins2*, *circ-Ins2*, and *ci-Ins2* in mouse pancreatic islets were resolved and visualized in SYBR Gold stained 2.5 % agarose gel.

**Figure S5**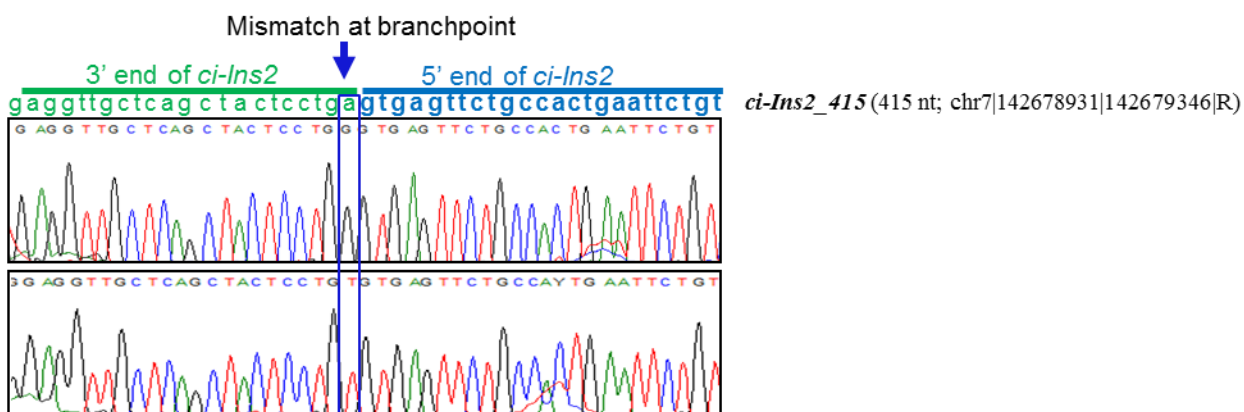

**Supplementary Figure S5: Lariat branch point sequence of *ci-Ins2\_415*.** PCR products of *ci-Ins2* from  $\beta$ TC6 cells were purified and cloned into pGEM®-T Easy vector followed sequencing to confirm the branchpoint junction sequences of *ci-Ins2* transcripts. Majority of the clones correspond to the lariat sequence of *ci-Ins2* (415 nt). The blue box in the chromatograph shows sequence mismatch error (G/T) at the branchpoint nucleotide-A.

**Figure S6****A*****ci-Ins2* (486 nt; chr7|142678860|142679346|R)**

gtgagttctgccactgaattctgtccccagtgctaactaccctggttttcttcacactgggacattgtaaattgtgtccta  
 ggtgtggaggggtctcgggataaccaggagtgaggacacgtttctgggggaagctagacatatgtaaacatggcagctgcca  
 ggaatgagtaagaatcctgccttaaggggtccttggtggtagtaacttgggacatgtgactagatcccaggataggtaaccta  
 tttagggccctcatagagcactgcactgactgaagatgagtaggctttagaggcccatgtgtccatccatgaccagtgactt  
 gtcccacaggcatgcaacccctgccacctgcaggggttaaggggcgagaaaacctggggtagtaggaggttgctcagctact  
 cctgactggattttcctatgtgtctttgcttctgtgctgctgatgccctggcctgctctgacacaacctccctggc

***ci-Ins2* (442 nt; chr7|142678904|142679346|R)**

gtgagttctgccactgaattctgtccccagtgctaactaccctggttttcttcacactgggacattgtaaattgtgtccta  
 ggtgtggaggggtctcgggataaccaggagtgaggacacgtttctgggggaagctagacatatgtaaacatggcagctgcca  
 ggaatgagtaagaatcctgccttaaggggtccttggtggtagtaacttgggacatgtgactagatcccaggataggtaaccta  
 tttagggccctcatagagcactgcactgactgaagatgagtaggctttagaggcccatgtgtccatccatgaccagtgactt  
 gtcccacaggcatgcaacccctgccacctgcaggggttaaggggcgagaaaacctggggtagtaggaggttgctcagctact  
 cctgactggattttcctatgtgtctttgcttc

***ci-Ins2* (438 nt; chr7|142678908|142679346|R)**

gtgagttctgccactgaattctgtccccagtgctaactaccctggttttcttcacactgggacattgtaaattgtgtccta  
 ggtgtggaggggtctcgggataaccaggagtgaggacacgtttctgggggaagctagacatatgtaaacatggcagctgcca  
 ggaatgagtaagaatcctgccttaaggggtccttggtggtagtaacttgggacatgtgactagatcccaggataggtaaccta  
 tttagggccctcatagagcactgcactgactgaagatgagtaggctttagaggcccatgtgtccatccatgaccagtgactt  
 gtcccacaggcatgcaacccctgccacctgcaggggttaaggggcgagaaaacctggggtagtaggaggttgctcagctact  
 cctgactggattttcctatgtgtctttg

***ci-Ins2* (415 nt; chr7|142678931|142679346|R)**

gtgagttctgccactgaattctgtccccagtgctaactaccctggttttcttcacactgggacattgtaaattgtgtccta  
 ggtgtggaggggtctcgggataaccaggagtgaggacacgtttctgggggaagctagacatatgtaaacatggcagctgcca  
 ggaatgagtaagaatcctgccttaaggggtccttggtggtagtaacttgggacatgtgactagatcccaggataggtaaccta  
 tttagggccctcatagagcactgcactgactgaagatgagtaggctttagaggcccatgtgtccatccatgaccagtgactt  
 gtcccacaggcatgcaacccctgccacctgcaggggttaaggggcgagaaaacctggggtagtaggaggttgctcagctact  
 cctga

**B**

ci-RNA consensus sequence [Zhang et al. 2013]

| CG                                                       | CA  | CAU | CG | CA | N  | GC | CG | UC | GC | CA | G                        | U | G | AG | G | UCA | GA |
|----------------------------------------------------------|-----|-----|----|----|----|----|----|----|----|----|--------------------------|---|---|----|---|-----|----|
| a                                                        | c   | c   | u  | c  | c  | c  | u  | g  | g  | c  | g                        | u | g | a  | g | u   | u  |
| g                                                        | u   | c   | u  | u  | u  | c  | c  | u  | u  | c  | g                        | u | g | a  | g | u   | u  |
| a                                                        | u   | g   | u  | g  | u  | u  | g  | u  | u  | g  | g                        | u | g | a  | g | u   | u  |
| -11                                                      | -10 | -9  | -8 | -7 | -6 | -5 | -4 | -3 | -2 | -1 | 1                        | 2 | 3 | 4  | 5 | 6   | 7  |
| 3' end of <i>ci-Ins2</i>                                 |     |     |    |    |    |    |    |    |    |    | 5' end of <i>ci-Ins2</i> |   |   |    |   |     |    |
| <i>ci-Ins2</i> _486 (486 nt; chr7 142678860 142679346 R) |     |     |    |    |    |    |    |    |    |    |                          |   |   |    |   |     |    |
| <i>ci-Ins2</i> _442 (442 nt; chr7 142678904 142679346 R) |     |     |    |    |    |    |    |    |    |    |                          |   |   |    |   |     |    |
| <i>ci-Ins2</i> _438 (438 nt; chr7 142678908 142679346 R) |     |     |    |    |    |    |    |    |    |    |                          |   |   |    |   |     |    |
| <i>ci-Ins2</i> _415 (415 nt; chr7 142678931 142679346 R) |     |     |    |    |    |    |    |    |    |    |                          |   |   |    |   |     |    |

**Supplementary Figure S6. Sequence of *ci-Ins2* transcripts.** (A) Sequences of validated *ci-Ins2* transcripts generated from the intron 2 of *Ins2* pre-mRNA. (B) Representations of the lariat junction sequence (11 nt from the end and 7 nt from the start) of validated *ci-Ins2* RNAs and the ci-RNA consensus sequence reported by Zhang et al. 2013 [Reference 16].

**Supplementary Table S1:** List of oligos used for the study

| Oligo name         | Sequence (5'-3')       |
|--------------------|------------------------|
| 18S rRNA-F         | GTAACCCGTTGAACCCATT    |
| 18S rRNA-R         | CCATCCAATCGGTAGTAGCG   |
| Gapdh-F            | AACTTTGGCATTGTGGAAGG   |
| Gapdh-R            | GGATGCAGGGATGATGTTCT   |
| mActb-F            | TGTTACCAACTGGGACGACA   |
| mActb-R            | GGGGTGTGAAGGTCTCAAA    |
| mIns1-F            | AAGCAGGTCATTGTTTCAACA  |
| mIns1-R            | TTGGGTGTGTAGAAGAAGCC   |
| mIns2-R            | CAAAGGTGCTGCTTGACAAA   |
| mIns2-F            | CAGCAAGCAGGAAGGTTATT   |
| circ-Ins2-div-F    | TGGAGGCTCTCTACCTGGTG   |
| circ-Ins2-div-R    | CAGGAAGCGCATCCACAG     |
| ci-Ins2-div-F      | ACCTGCAGGGGTTAAGGGGCGA |
| ci-Ins2-div-R      | AGACCCTCCACACCTAGGACAC |
| ciIns2_415_junc-F  | CTACTCCTGAGTGAGTTCTG   |
| ciIns2_438_junc-F  | TGTGTCTTTGGTGAGTTCTG   |
| ciIns2_442_junc-F  | GTCTTTGCTTCGTGAGTTCTG  |
| ci-Ins2 486_junc-F | CCTCCCTGGCGTGAGTTCTG   |
| ci-Ins2-common-R   | CCCCTTAAGGCAGGATTCTT   |
| circAsph_F         | GGCGATGGAGACTTTGATGT   |
| circAsph_R         | GCAATGCAATGACCATGAAC   |
| circBckdhhb_F      | GTGCCTTGGGATGTGGATAC   |
| circBckdhhb_R      | TTCCGCAATAGCTGTAGCAC   |
| circGlis3_F        | GGACTGGCTGCCCTAGAAG    |
| circGlis3_R        | TCAAAGTCGTGGACACCAGA   |
| circNbas_F         | CCTGTGATGTCTGCCTGAAG   |
| circNbas_R         | CAAAGAGGTGAAGGGTTTGG   |
| CircCdk8_F         | GGGGAATGGTGAAGTCACTG   |
| circCdk8_R         | CTGCATGCCGACATAGAAAT   |
| circAmbra1_F       | CAGAATCGGCTTCGTTCTTC   |
| circAmbra1_R       | GTGCTCTCTGGATCCTGCTC   |

**Supplementary Table S2:** circRNA annotation by CIRCexplorer2.**Supplementary Table S3:** circRNA annotation by CIRI2.

**Supplementary Table S4:** List of circRNAs derived from mouse *Ins1* and *Ins2* gene detected using CIRCexplorer2. The Bold and highlighted circRNAs were PCR validated in  $\beta$ TC6 cells.

| circRNA_ID                        | Splice length | Type of circular RNA | Name of gene | Name of isoform     | logFC (HFD vs ND) | PValue        |
|-----------------------------------|---------------|----------------------|--------------|---------------------|-------------------|---------------|
| <b>chr7 142678860 142679346 R</b> | <b>486</b>    | <b>ciRNA</b>         | <b>Ins2</b>  | <b>NM_001185083</b> | <b>-3.3804</b>    | <b>0.0094</b> |
| chr7 142678861 142679346 R        | 485           | ciRNA                | Ins2         | NM_001185083        | -1.8602           | 0.0115        |
| chr7 142678862 142679346 R        | 484           | ciRNA                | Ins2         | NM_001185083        | -0.0678           | 0.8479        |
| chr7 142678863 142679346 R        | 483           | ciRNA                | Ins2         | NM_001185083        | -3.1554           | 0.1642        |
| chr7 142678864 142679346 R        | 482           | ciRNA                | Ins2         | NM_001185083        | -1.5410           | 0.4156        |
| chr7 142678865 142679346 R        | 481           | ciRNA                | Ins2         | NM_001185083        | -0.7983           | 0.6450        |
| chr7 142678866 142679346 R        | 480           | ciRNA                | Ins2         | NM_001185083        | -1.8518           | 0.3481        |
| chr7 142678867 142679346 R        | 479           | ciRNA                | Ins2         | NM_001185083        | -0.6998           | 0.7369        |
| chr7 142678886 142679346 R        | 460           | ciRNA                | Ins2         | NM_001185083        | 1.9570            | 0.3227        |
| chr7 142678894 142679346 R        | 452           | ciRNA                | Ins2         | NM_001185083        | -2.6842           | 0.2809        |
| chr7 142678897 142679346 R        | 449           | ciRNA                | Ins2         | NM_001185083        | 0.1052            | 0.9676        |
| chr7 142678900 142679346 R        | 446           | ciRNA                | Ins2         | NM_001185083        | -1.8518           | 0.3481        |
| chr7 142678901 142679346 R        | 445           | ciRNA                | Ins2         | NM_001185083        | -2.5677           | 0.2984        |
| chr7 142678902 142679346 R        | 444           | ciRNA                | Ins2         | NM_001185083        | 0.9340            | 0.1620        |
| chr7 142678903 142679346 R        | 443           | ciRNA                | Ins2         | NM_001185083        | -1.5621           | 0.4099        |
| <b>chr7 142678904 142679346 R</b> | <b>442</b>    | <b>ciRNA</b>         | <b>Ins2</b>  | <b>NM_001185083</b> | <b>-3.3891</b>    | <b>0.0090</b> |
| chr7 142678905 142679346 R        | 441           | ciRNA                | Ins2         | NM_001185083        | -0.5298           | 0.2251        |
| chr7 142678906 142679346 R        | 440           | ciRNA                | Ins2         | NM_001185083        | -0.7810           | 0.3636        |
| chr7 142678907 142679346 R        | 439           | ciRNA                | Ins2         | NM_001185083        | -0.8397           | 0.3184        |
| <b>chr7 142678908 142679346 R</b> | <b>438</b>    | <b>ciRNA</b>         | <b>Ins2</b>  | <b>NM_001185083</b> | <b>-2.6556</b>    | <b>0.0050</b> |
| chr7 142678909 142679346 R        | 437           | ciRNA                | Ins2         | NM_001185083        | -0.0175           | 0.9803        |
| chr7 142678910 142679346 R        | 436           | ciRNA                | Ins2         | NM_001185083        | 0.5333            | 0.2613        |
| chr7 142678911 142679346 R        | 435           | ciRNA                | Ins2         | NM_001185083        | -1.0172           | 0.0185        |
| chr7 142678912 142679346 R        | 434           | ciRNA                | Ins2         | NM_001185083        | 0.8520            | 0.6798        |
| chr7 142678913 142679346 R        | 433           | ciRNA                | Ins2         | NM_001185083        | 0.4149            | 0.7938        |
| chr7 142678914 142679346 R        | 432           | ciRNA                | Ins2         | NM_001185083        | -3.0570           | 0.1781        |
| chr7 142678915 142679346 R        | 431           | ciRNA                | Ins2         | NM_001185083        | -1.1527           | 0.4816        |
| chr7 142678917 142679346 R        | 429           | ciRNA                | Ins2         | NM_001185083        | -1.8068           | 0.3539        |
| chr7 142678918 142679346 R        | 428           | ciRNA                | Ins2         | NM_001185083        | 3.4918            | 0.1026        |
| chr7 142678919 142679346 R        | 427           | ciRNA                | Ins2         | NM_001185083        | 0.1028            | 0.9682        |
| chr7 142678920 142679346 R        | 426           | ciRNA                | Ins2         | NM_001185083        | 0.0780            | 0.9671        |
| <b>chr7 142678931 142679346 R</b> | <b>415</b>    | <b>ciRNA</b>         | <b>Ins2</b>  | <b>NM_001185083</b> | <b>-2.5677</b>    | <b>0.2984</b> |
| chr7 142678933 142679346 R        | 413           | ciRNA                | Ins2         | NM_001185083        | 0.0612            | 0.9793        |
| chr7 142678935 142679346 R        | 411           | ciRNA                | Ins2         | NM_001185083        | -1.8068           | 0.3539        |
| chr7 142678938 142679346 R        | 408           | ciRNA                | Ins2         | NM_001185083        | -1.8784           | 0.3448        |
| chr7 142678964 142679346 R        | 382           | ciRNA                | Ins2         | NM_001185083        | -2.5677           | 0.2984        |
| chr7 142678965 142679346 R        | 381           | ciRNA                | Ins2         | NM_001185083        | -1.8518           | 0.3481        |
| chr7 142679346 142679547 R        | 201           | circRNA              | Ins2         | NM_001185083        | 0.3601            | 0.7964        |
| chr7 142679346 142679559 R        | 213           | circRNA              | Ins2         | NM_008387           | -1.8518           | 0.3481        |
| chr19 52264491 52264609 F         | 118           | ciRNA                | Ins1         | NM_008386           | -1.8784           | 0.3448        |
| chr19 52264491 52264593 F         | 102           | ciRNA                | Ins1         | NM_008386           | -3.4188           | 0.1163        |

**Supplementary Table S5:** List of RBPs and the number of binding sites predicted on different regions of mouse *Ins2* pre-mRNA using beRBP.

|           | Exon1 | Intron1 | Exon2   |         | Intron2 |         |         |         |         | Exon3   |          |
|-----------|-------|---------|---------|---------|---------|---------|---------|---------|---------|---------|----------|
|           | 1-65  | 66-179  | 180-279 | 280-380 | 381-480 | 481-580 | 581-680 | 681-780 | 781-868 | 869-968 | 969-1071 |
| SRSF3     | 7     | 29      | 24      | 10      | 11      | 0       | 0       | 2       | 14      | 1       | 20       |
| MBNL1     | 0     | 1       | 17      | 5       | 4       | 3       | 2       | 0       | 19      | 6       | 7        |
| SRSF2     | 0     | 1       | 12      | 5       | 6       | 3       | 4       | 0       | 9       | 7       | 3        |
| PTBP1     | 0     | 17      | 7       | 8       | 3       | 0       | 0       | 0       | 9       | 0       | 4        |
| CUG-BP    | 0     | 0       | 9       | 2       | 3       | 3       | 0       | 1       | 12      | 1       | 4        |
| TARDBP    | 0     | 0       | 1       | 18      | 5       | 0       | 1       | 2       | 7       | 0       | 0        |
| SRSF5     | 0     | 8       | 3       | 3       | 3       | 2       | 1       | 2       | 4       | 3       | 2        |
| HNRNPF    | 0     | 0       | 0       | 10      | 2       | 4       | 0       | 3       | 0       | 3       | 0        |
| SRSF1     | 1     | 0       | 0       | 4       | 0       | 0       | 1       | 0       | 3       | 10      | 0        |
| HNRPA1    | 0     | 2       | 0       | 0       | 2       | 5       | 4       | 5       | 0       | 0       | 0        |
| YBX1      | 10    | 0       | 0       | 0       | 0       | 0       | 0       | 0       | 0       | 0       | 7        |
| HNRPA1L2  | 0     | 2       | 0       | 0       | 3       | 4       | 3       | 4       | 0       | 0       | 0        |
| HNRNPA2B1 | 0     | 0       | 0       | 0       | 2       | 4       | 4       | 4       | 0       | 1       | 0        |
| BRUNOL4   | 0     | 0       | 0       | 3       | 3       | 0       | 0       | 0       | 4       | 0       | 0        |
| BRUNOL5   | 0     | 0       | 0       | 3       | 3       | 0       | 0       | 0       | 4       | 0       | 0        |
| HNRNPK    | 0     | 2       | 4       | 0       | 0       | 0       | 0       | 0       | 0       | 0       | 3        |
| PCBP1     | 0     | 2       | 5       | 0       | 0       | 0       | 0       | 0       | 0       | 0       | 2        |
| RBM38     | 0     | 0       | 0       | 3       | 3       | 1       | 0       | 0       | 2       | 0       | 0        |
| TRA2B     | 0     | 0       | 0       | 0       | 4       | 1       | 0       | 1       | 0       | 2       | 0        |
| YBX2      | 3     | 0       | 0       | 0       | 0       | 0       | 0       | 0       | 2       | 1       | 2        |
| HNRNPH2   | 0     | 0       | 0       | 2       | 1       | 2       | 0       | 0       | 0       | 2       | 0        |
| RBM24     | 0     | 0       | 0       | 3       | 2       | 0       | 0       | 0       | 2       | 0       | 0        |
| SRSF7     | 0     | 0       | 0       | 0       | 0       | 0       | 4       | 0       | 0       | 0       | 3        |
| BRUNOL6   | 0     | 0       | 0       | 4       | 2       | 0       | 0       | 0       | 0       | 0       | 0        |
| HNRNPL    | 0     | 0       | 0       | 3       | 0       | 0       | 0       | 0       | 2       | 1       | 0        |
| HNRPLL    | 0     | 0       | 0       | 3       | 0       | 0       | 0       | 3       | 0       | 0       | 0        |
| PCBP2     | 0     | 0       | 4       | 0       | 0       | 0       | 0       | 0       | 1       | 0       | 1        |
| PCBP3     | 0     | 3       | 0       | 0       | 0       | 0       | 0       | 0       | 3       | 0       | 0        |
| CPEB4     | 0     | 0       | 2       | 1       | 2       | 0       | 0       | 0       | 0       | 0       | 0        |
| DAZAP1    | 0     | 2       | 0       | 0       | 0       | 0       | 1       | 2       | 0       | 0       | 0        |
| ESRP2     | 0     | 0       | 0       | 0       | 1       | 3       | 1       | 0       | 0       | 0       | 0        |
| HuR       | 0     | 0       | 0       | 0       | 2       | 0       | 0       | 0       | 3       | 0       | 0        |
| IGF2BP3   | 3     | 0       | 0       | 2       | 0       | 0       | 0       | 0       | 0       | 0       | 0        |
| PABPC3    | 3     | 0       | 0       | 0       | 0       | 0       | 0       | 1       | 0       | 0       | 1        |
| PABPC4    | 3     | 0       | 0       | 0       | 0       | 0       | 0       | 0       | 0       | 0       | 2        |
| RBM28     | 0     | 0       | 0       | 0       | 1       | 0       | 0       | 2       | 0       | 2       | 0        |
| HNRNPC    | 0     | 0       | 2       | 0       | 2       | 0       | 0       | 0       | 0       | 0       | 0        |
| IGF2BP2   | 3     | 0       | 0       | 1       | 0       | 0       | 0       | 0       | 0       | 0       | 0        |
| NOVA1     | 0     | 0       | 0       | 0       | 0       | 0       | 0       | 4       | 0       | 0       | 0        |
| PABPC1    | 2     | 0       | 0       | 0       | 0       | 0       | 0       | 0       | 0       | 0       | 2        |
| SART3     | 2     | 0       | 0       | 0       | 0       | 0       | 0       | 0       | 0       | 0       | 2        |
| TIAI      | 0     | 0       | 2       | 1       | 1       | 0       | 0       | 0       | 0       | 0       | 0        |

|          |   |   |   |   |   |   |   |   |   |   |   |
|----------|---|---|---|---|---|---|---|---|---|---|---|
| U2AF2    | 0 | 0 | 0 | 0 | 3 | 0 | 0 | 0 | 1 | 0 | 0 |
| ZC3H14   | 0 | 0 | 0 | 0 | 2 | 0 | 0 | 0 | 2 | 0 | 0 |
| FMR1     | 0 | 0 | 0 | 0 | 0 | 0 | 3 | 0 | 0 | 0 | 0 |
| HNRNPH1  | 0 | 0 | 0 | 1 | 0 | 0 | 2 | 0 | 0 | 0 | 0 |
| LIN28A   | 0 | 0 | 0 | 0 | 1 | 0 | 0 | 1 | 0 | 1 | 0 |
| RALY     | 0 | 0 | 1 | 0 | 2 | 0 | 0 | 0 | 0 | 0 | 0 |
| RBM42    | 0 | 0 | 0 | 0 | 0 | 0 | 0 | 0 | 0 | 0 | 3 |
| RBM46    | 1 | 0 | 0 | 0 | 0 | 0 | 0 | 0 | 0 | 0 | 2 |
| RBMS1    | 0 | 2 | 0 | 0 | 0 | 0 | 1 | 0 | 0 | 0 | 0 |
| SFPQ     | 0 | 0 | 0 | 2 | 0 | 1 | 0 | 0 | 0 | 0 | 0 |
| SRSF9    | 0 | 0 | 0 | 0 | 0 | 0 | 1 | 0 | 0 | 2 | 0 |
| ANKHD1   | 0 | 0 | 0 | 0 | 0 | 2 | 0 | 0 | 0 | 0 | 0 |
| CPEB2    | 0 | 0 | 1 | 1 | 0 | 0 | 0 | 0 | 0 | 0 | 0 |
| FXR1     | 0 | 0 | 0 | 0 | 0 | 0 | 0 | 2 | 0 | 0 | 0 |
| FXR2     | 0 | 0 | 0 | 0 | 0 | 0 | 2 | 0 | 0 | 0 | 0 |
| G3BP2    | 0 | 0 | 0 | 0 | 0 | 0 | 0 | 1 | 1 | 0 | 0 |
| HNRNPCL1 | 0 | 0 | 2 | 0 | 0 | 0 | 0 | 0 | 0 | 0 | 0 |
| HNRNPU   | 0 | 0 | 0 | 1 | 0 | 0 | 0 | 0 | 1 | 0 | 0 |
| KHDRBS2  | 0 | 0 | 0 | 0 | 0 | 0 | 0 | 0 | 0 | 0 | 2 |
| KHDRBS3  | 0 | 0 | 0 | 0 | 0 | 0 | 0 | 0 | 0 | 0 | 2 |
| MSI1     | 0 | 0 | 0 | 0 | 0 | 0 | 0 | 2 | 0 | 0 | 0 |
| RBFOX1   | 0 | 0 | 0 | 0 | 0 | 0 | 0 | 2 | 0 | 0 | 0 |
| RBM41    | 0 | 0 | 0 | 0 | 2 | 0 | 0 | 0 | 0 | 0 | 0 |
| RBM5     | 2 | 0 | 0 | 0 | 0 | 0 | 0 | 0 | 0 | 0 | 0 |
| RBM6     | 0 | 2 | 0 | 0 | 0 | 0 | 0 | 0 | 0 | 0 | 0 |
| RBMS3    | 0 | 0 | 0 | 0 | 0 | 2 | 0 | 0 | 0 | 0 | 0 |
| CNOT4    | 0 | 0 | 0 | 0 | 0 | 0 | 1 | 0 | 0 | 0 | 0 |
| HNRNPM   | 0 | 0 | 0 | 0 | 0 | 0 | 0 | 1 | 0 | 0 | 0 |
| KHDRBS1  | 0 | 0 | 0 | 0 | 0 | 0 | 0 | 0 | 0 | 0 | 1 |
| PABPN1   | 0 | 0 | 0 | 0 | 0 | 0 | 0 | 0 | 0 | 0 | 1 |
| SAMD4A   | 0 | 0 | 0 | 0 | 0 | 0 | 0 | 0 | 0 | 1 | 0 |
| SNRPA    | 0 | 0 | 0 | 0 | 0 | 0 | 0 | 0 | 0 | 1 | 0 |
| TUT1     | 0 | 1 | 0 | 0 | 0 | 0 | 0 | 0 | 0 | 0 | 0 |
| ZNF638   | 0 | 0 | 0 | 0 | 0 | 1 | 0 | 0 | 0 | 0 | 0 |

Supplementary Table S6: CircRNA-miRNA-mRNA regulatory network for *ci-Ins2* (486 nt)
